# Supplementary material for: A Flexible Lithium-Ion-Conducting Membrane with Highly Loaded Titanium Oxide Nanoparticles to Promote Charge Transfer for Lithium–Air Battery
Source: MDPI journal article supplement (doi:10.3390/polym15102409), 2023-05-22
Supplement: s1 [file s1]

# A Flexible Lithium-Ion-Conducting Membrane with Highly Loaded Titanium Oxide Nanoparticles to Promote Charge Transfer for Lithium–Air Battery

Si-Han Peng <sup>1</sup>, Yen-Hsiang Yu <sup>1</sup>, Hsin-Chun Lu <sup>1,\*</sup> and Shingjiang Jessie Lue <sup>1,2,3,\*</sup>

<sup>1</sup> Department of Chemical and Materials Engineering, Chang Gung University, Guishan District, Taoyuan City 333, Taiwan; d1123003@cgu.edu.tw (S.-H.P.); sean0229530699@gmail.com (Y.-H.Y.)

<sup>2</sup> Department of Orthopedics, Chang Gung Memorial Hospital, Linkou, Guishan District, Taoyuan City 333, Taiwan

<sup>3</sup> Department of Safety, Health and Environmental Engineering, Ming-Chi University of Technology, Taishan District, New Taipei City 243, Taiwan

\* Correspondence: hsinchun@mail.cgu.edu.tw (H.-C.L.); jessie@mail.cgu.edu.tw (S.J.L.)

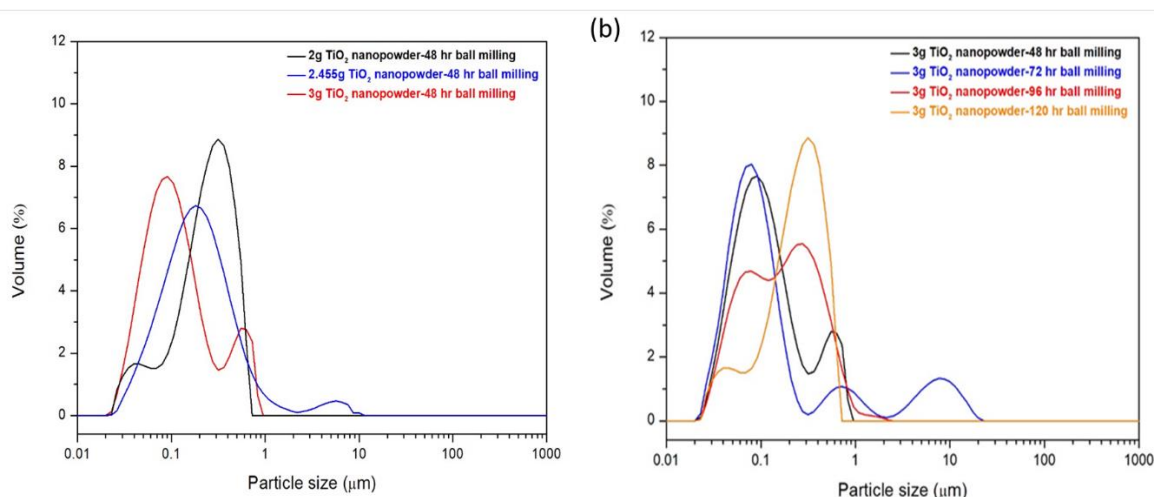

**Figure S1.** Ball milling conditions effects on prepared TiO<sub>2</sub> powder: (a) powder weight (b) ball milling time.

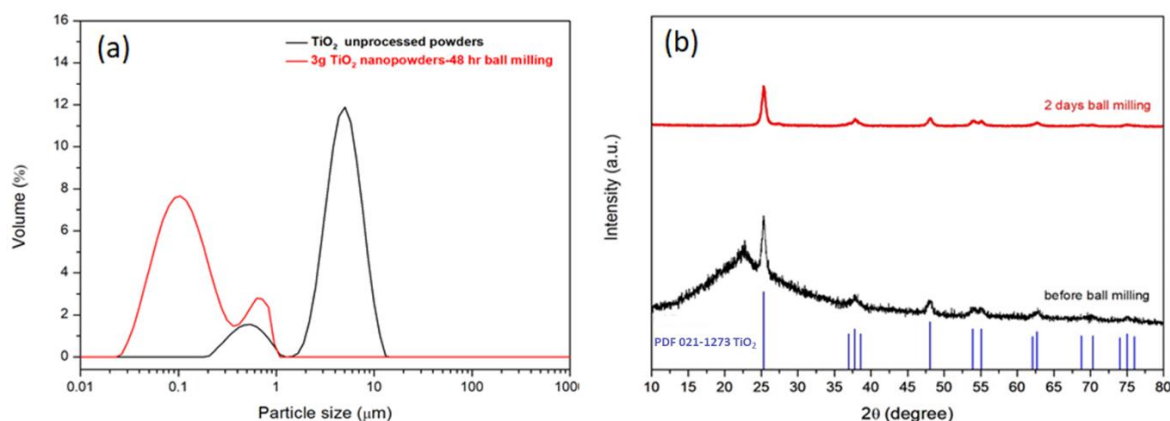

**Figure S2.** TiO<sub>2</sub> powder refinement before-and-after 48 hours ball milling treatment: (a) powder size distribution (b) XRD result.

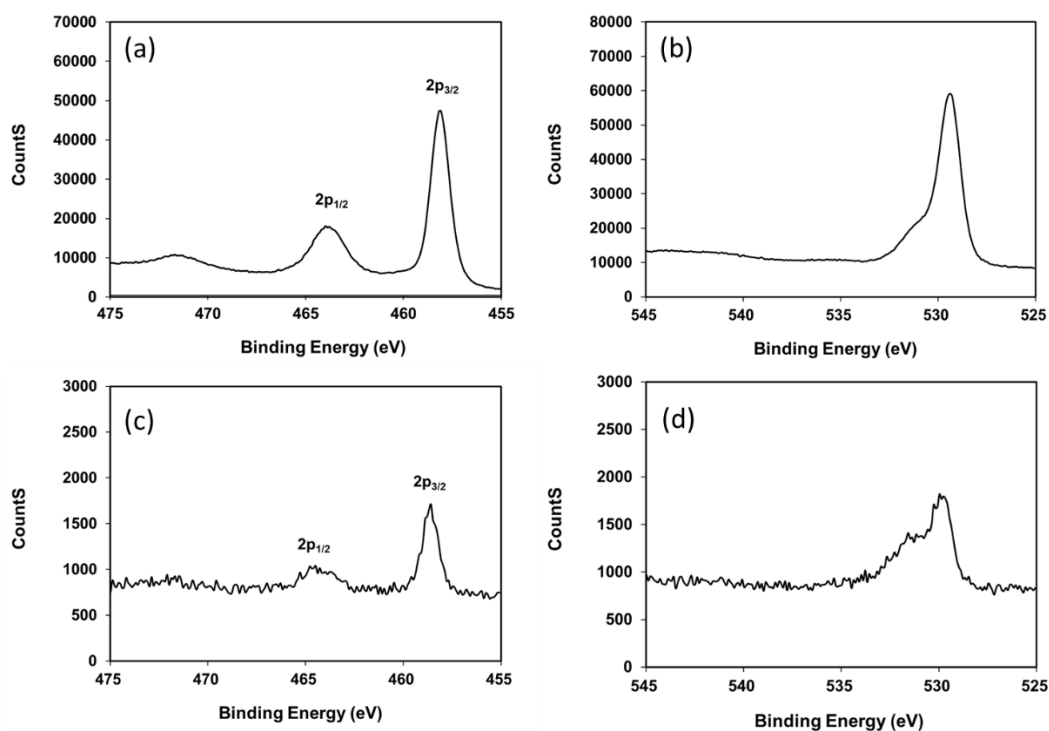

**Figure S3.** High-resolution XPS spectrum of commercial  $\text{TiO}_2$  powder:(a) Ti 2p peaks and (b) O 1s peak; and as-prepared 50 wt%  $\text{TiO}_2$  FC-LICM of (c) Ti 2p and (d) O 1s.

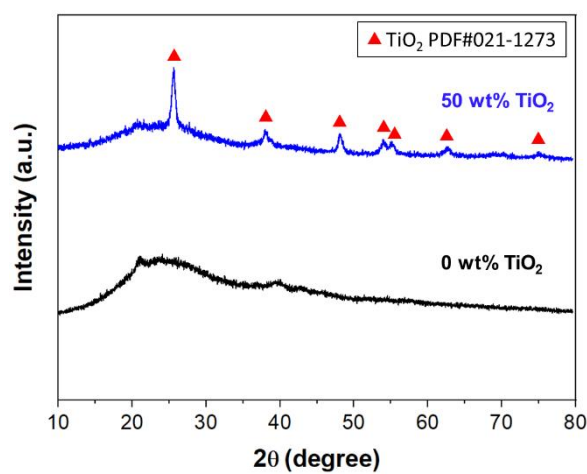

**Figure S4.** XRD result of 0 wt%  $\text{TiO}_2$  and 50 wt%  $\text{TiO}_2$  incorporated FC-LICM sample.

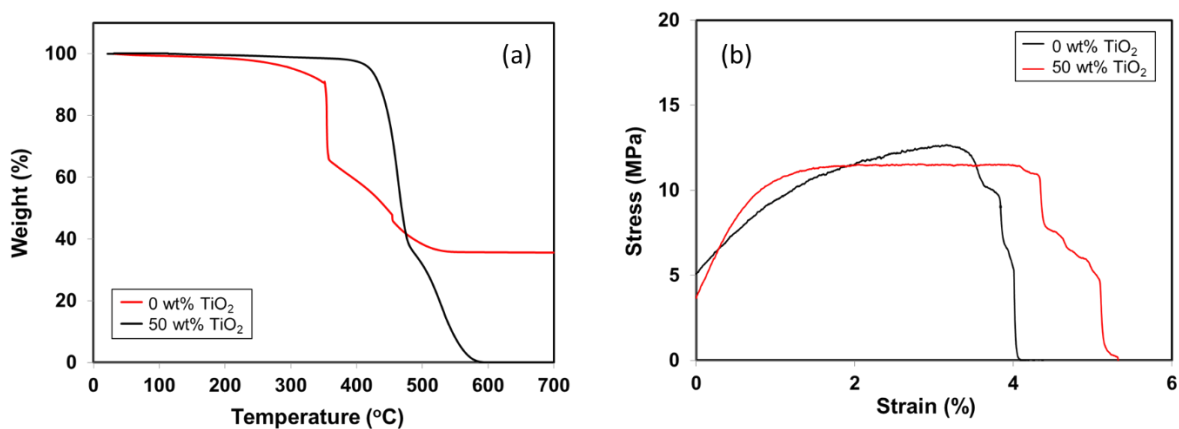

**Figure S5.** (a) TGA result and (b) tensile result for 0 wt% and 50 wt% TiO<sub>2</sub> incorporated FC-LICM samples.

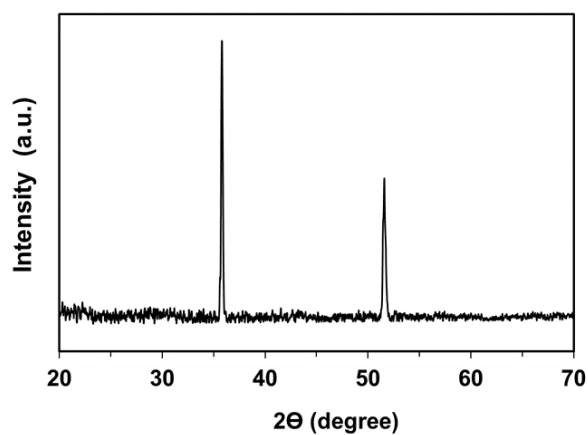

**Figure S6.** XRD pattern of the pristine lithium anode.
